# Supplementary material for: An integrated targeting drug delivery system based on the hybridization of graphdiyne and MOFs for visualized cancer therapy
Source: Royal Society of Chemistry journal article supplement (doi:10.1039/c9nr02017a), 2019-01-01
Supplement: c9nr02017a1.pdf [file c9nr02017a1.pdf]

## Supporting Information

### **An integrated targeting drug delivery system based on the hybridization of graphdiyne and MOFs for visualized cancer diagnosis and therapy**

Zhongbo Xue,<sup>a</sup> Mengyao Zhu,<sup>a</sup> Yuze Dong,<sup>a</sup> Tong Feng,<sup>a</sup> Zhuozhi Chen,<sup>b</sup> Yaqing Feng,<sup>a</sup> Zhongqiang Shan,<sup>a</sup> Jialiang Xu<sup>\*a,c</sup> and Shuxian Meng<sup>\*a</sup>

---

<sup>a</sup> School of Chemical Engineering and Technology, Tianjin University, Yaguan Road 135, Tianjin 300050, P.R. China. Email: [msxmail@tju.edu.cn](mailto:msxmail@tju.edu.cn)

<sup>b</sup> School of Life Sciences, Tianjin University, Weijin Road 92, Tianjin 300072, P.R. China. Email: [zhuozhichen@tju.edu.cn](mailto:zhuozhichen@tju.edu.cn)

<sup>c</sup> School of Materials Science and Engineering, Nankai University, Tongyan Road 38, Tianjin 300350, P.R. China. Email: [jialiang.xu@nankai.edu.cn](mailto:jialiang.xu@nankai.edu.cn)

| functional group  | compound                       | IR absorption regions/cm <sup>-1</sup> |              |           |            |           |
|-------------------|--------------------------------|----------------------------------------|--------------|-----------|------------|-----------|
|                   |                                | 4000~2500                              | 2500~2000    | 2000~1500 | 1500~900   | Below 900 |
| R-NH <sub>2</sub> | UIO-66-NH <sub>2</sub><br>FUGY | 3348<br>3458                           |              |           |            |           |
| C=C               | GDY<br>FUGY                    |                                        |              | 1603      | 1449       |           |
| C≡C               | GDY<br>FUGY                    |                                        | 2122<br>2207 |           |            |           |
| -CONH-            | FUGY                           | 3100(N-H)                              |              | 1648(I)   | 1207( II ) |           |

**Tab. S1** The vibrational modes of UIO-66-NH<sub>2</sub>, GDY and FUGY

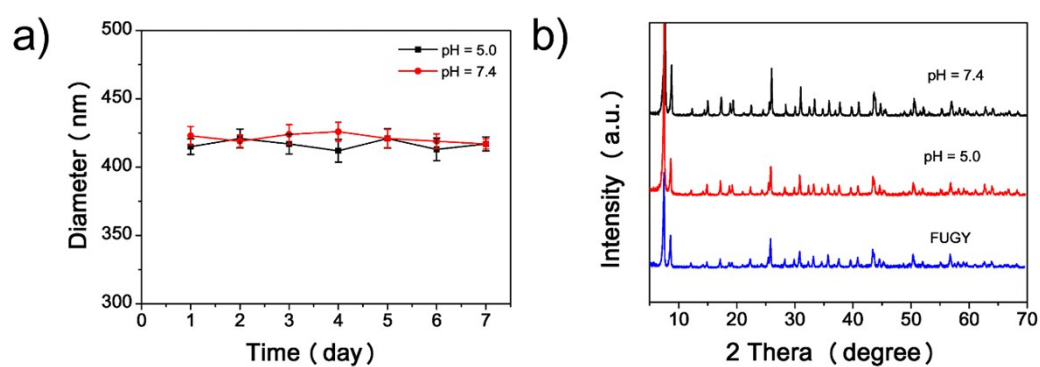

**Fig. S1** The particle sizes (a) and PXRD patterns (b) of FUGY after immersion in solutions with different pH for one week.

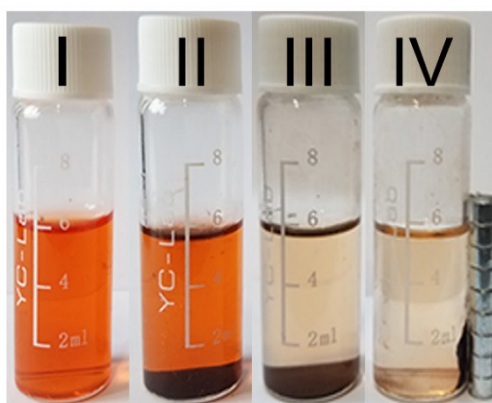

**Fig. S2** Drug loading process ( I ~III) and targeting effect (IV) of FUGY.

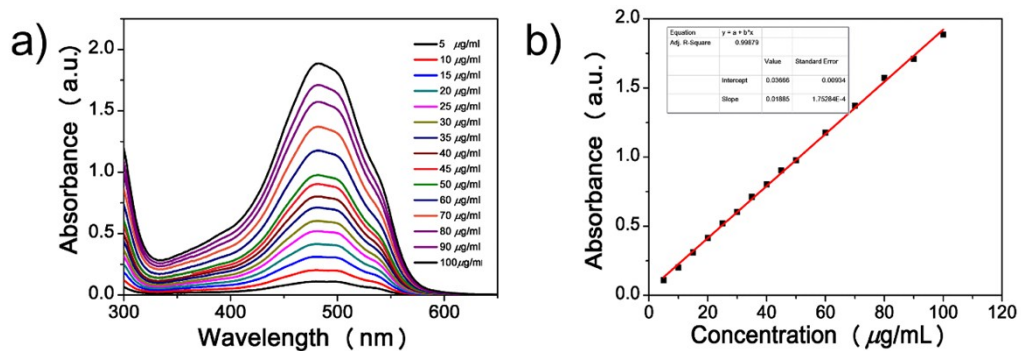

**Fig. S3** (a) UV-vis spectra of doxorubicin (DOX) under different content. (b) Standard curve of DOX from UV-vis spectra.

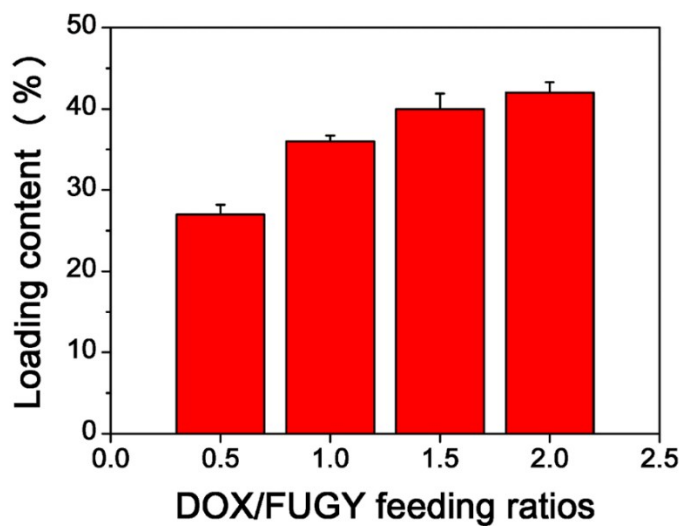

**Fig. S4** Loading content of FUGY/DOX at different initial DOX/FUGY feeding ratios.

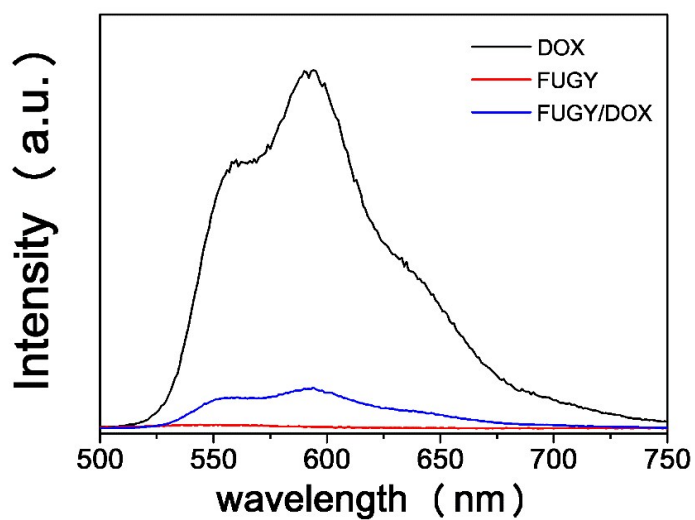

**Fig. S5** Fluorescence spectra of DOX, FUGY, and FUGY/DOX.

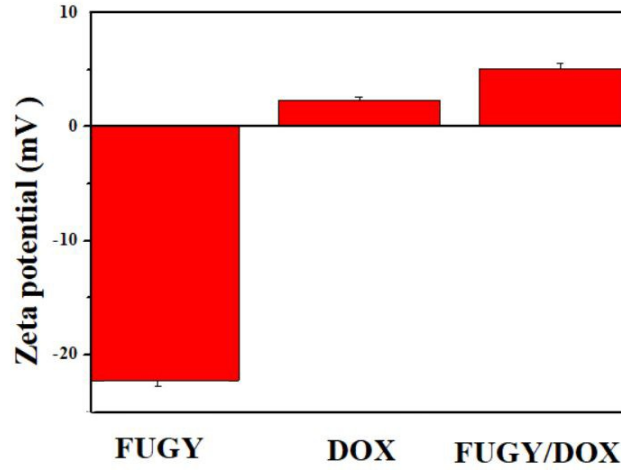

Fig. S6 Zeta potential of FUGY, DOX and FUGY/DOX.

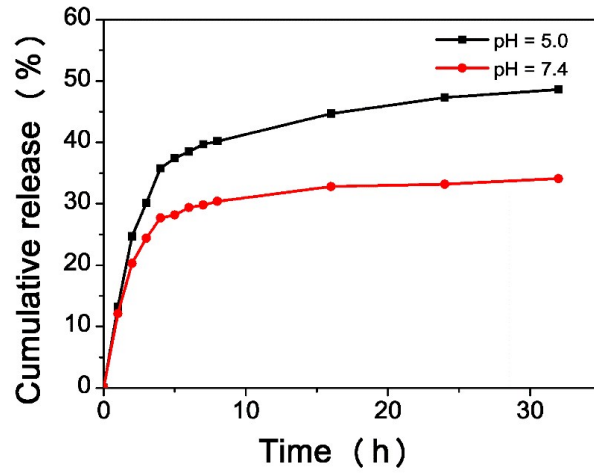

Fig. S7 DOX released from FUGY/DOX at pH 5.0 and 7.4.

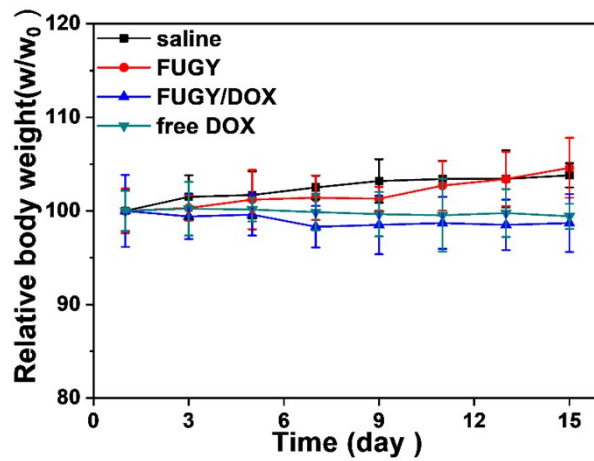

Fig. S8 Changes in relative body weights of four groups.
